# Supplementary material for: Addressing cultural and knowledge barriers to enable preclinical sex inclusive research
Source: eLife journal article supplement (doi:10.7554/elife.106545), 2025-06-18
Supplement: supp7 [file elife-106545-supp7-v1.pdf]

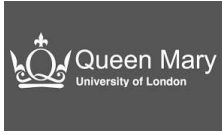

# Exploring researchers' perspective on sex inclusive in vivo research

## Post-workshop survey

If you have any questions about this survey, please find a survey facilitator or contact Prof. Amrita Ahluwalia [a.ahluwalia@qmul.ac.uk](mailto:a.ahluwalia@qmul.ac.uk) or Dr. Jonathan Ho [jonathan.ho@qmul.ac.uk](mailto:jonathan.ho@qmul.ac.uk)

\* Required

1. **Please write the same initials below that you used when filling out the pre workshop survey \***

2. Does your current research use animal models to investigate your disease of interest? \*

☐ Yes

☐ No

3. Does your research focus on a disease, or phenomena, that can occur in both sexes? \*

☐ Yes

☐ Sometimes

☐ No

4. How often are you involved or can influence the planning of experiments involving animals \*

☐ Never

☐ Rarely

☐ Sometimes

☐ Often

☐ Always

5. How familiar are you with factorial experimental designs (please consider your general knowledge and application of the technique)?

☐ Not at all familiar

☐ Not very familiar

☐ Somewhat familiar

☐ Familiar

☐ Extremely familiar

**Over the next few questions, answer based on your current thinking about how incorporating sex into an in vivo experimental design may affect the overall design, data or statistical analysis resulting from that study.**

6. Do you think inclusion of both sexes requires doubling a study's sample size?

☐ Yes

☐ Sometimes

☐ No

7. Do you think sex influences data variability, therefore when you include both sexes, more animals are needed?

☐ Yes

☐ Sometimes

☐ No

8. When analyzing *in vivo* data collected from both sexes, do you think sex should be included in the statistical model?

☐ Yes

☐ Sometimes

☐ No

9. When analyzing *in vivo* data collected from both sexes, do you think the analysis should be disaggregated (for example run a t-test comparing control and intervention on the male data and then running a separate test on the data from the females)?

☐ Yes

☐ Sometimes

☐ No

10. When analyzing *in vivo* data, do you think data from the two sexes should be pooled (combined) for the analysis (for example run a single t-test comparing control and intervention group)?

☐ Yes

☐ Sometimes

☐ No

Below we ask questions pertaining to including both sexes in an *in vivo* experiment in addition to the intervention of interest. This means that both sexes are planned into the experiment at the beginning stages. However, the purpose of the study does not have to include specific questions pertaining to the differences between the sexes.

11. Overall, I think that **including both sexes into an *in vivo* experimental design** is....

1= Bad                      7= Good

|   |   |   |   |   |   |   |
|---|---|---|---|---|---|---|
| 1 | 2 | 3 | 4 | 5 | 6 | 7 |
|---|---|---|---|---|---|---|

12. Overall, I think that **including both sexes into an *in vivo* experimental design** is....

1= Worthless                      7= Useful

|   |   |   |   |   |   |   |
|---|---|---|---|---|---|---|
| 1 | 2 | 3 | 4 | 5 | 6 | 7 |
|---|---|---|---|---|---|---|

13. Overall, I think that **including both sexes into an *in vivo* experimental design** is....

1= Harmful                      7= Beneficial

|   |   |   |   |   |   |   |
|---|---|---|---|---|---|---|
| 1 | 2 | 3 | 4 | 5 | 6 | 7 |
|---|---|---|---|---|---|---|

14. Overall, I think that **including both sexes into an *in vivo* experimental design** is....

1= The wrong thing to do                      7= The right thing to do

|   |   |   |   |   |   |   |
|---|---|---|---|---|---|---|
| 1 | 2 | 3 | 4 | 5 | 6 | 7 |
|---|---|---|---|---|---|---|

15. I feel confident in my ability to **include both sexes into an *in vivo* experimental design**

- ☐ Strongly disagree
- ☐ Disagree
- ☐ Somewhat disagree
- ☐ Neither agree nor disagree
- ☐ Somewhat agree
- ☐ Agree
- ☐ Strongly agree

16. Whether or not I **include both sexes in an *in vivo* experimental design** is completely up to me

- ☐ Strongly disagree
- ☐ Disagree
- ☐ Somewhat disagree
- ☐ Neither agree nor disagree
- ☐ Somewhat agree
- ☐ Agree
- ☐ Strongly agree



17. Overall, using **both sexes in an *in vivo* experimental design** is

- ☐ Extremely difficult
- ☐ Moderately difficult
- ☐ Slightly difficult
- ☐ Neither easy nor difficult
- ☐ Slightly easy
- ☐ Moderately easy
- ☐ Extremely easy

18. In my professional environment, stakeholders I respect think I should **include both sexes into an *in vivo* experimental design**

- ☐ Strongly disagree
- ☐ Disagree
- ☐ Somewhat disagree
- ☐ Neither agree nor disagree
- ☐ Somewhat agree
- ☐ Agree
- ☐ Strongly agree

19. I feel professional pressure from my scientific community to **include both sexes into an *in vivo* experimental design**

- ☐ Strongly disagree
- ☐ Disagree
- ☐ Somewhat disagree
- ☐ Neither agree nor disagree
- ☐ Somewhat agree
- ☐ Agree
- ☐ Strongly agree

20. It is expected of me that I **include both sexes into an *in vivo* experimental design**

- ☐ Strongly disagree
- ☐ Disagree
- ☐ Somewhat disagree
- ☐ Neither agree nor disagree
- ☐ Somewhat agree
- ☐ Agree
- ☐ Strongly agree

21. I expect to **include both sexes into an *in vivo* experimental design** in my next *in vivo* experiment

- ☐ Strongly disagree
- ☐ Disagree
- ☐ Somewhat disagree
- ☐ Neither agree nor disagree
- ☐ Somewhat agree
- ☐ Agree
- ☐ Strongly agree

22. I want to **include both sexes into an *in vivo* experimental design** in my next *in vivo* experiment

- ☐ Strongly disagree
- ☐ Disagree
- ☐ Somewhat disagree
- ☐ Neither agree nor disagree
- ☐ Somewhat agree
- ☐ Agree
- ☐ Strongly agree

23. I intend to **include both sexes into an *in vivo* experimental design** in my next *in vivo* experiment

- ☐ Strongly disagree
- ☐ Disagree
- ☐ Somewhat disagree
- ☐ Neither agree nor disagree
- ☐ Somewhat agree
- ☐ Agree
- ☐ Strongly agree

24. Select which of the following prevents you from **including both sexes** in future experiments in addition to the intervention of interest (choose **all** that apply):

- ☐ Availability of sample/test material
- ☐ Complexity of experimental design
- ☐ Convention
- ☐ Cost
- ☐ Data analysis concerns
- ☐ Experiment would take longer
- ☐ Female animals are more variable
- ☐ Logistics
- ☐ Male animals are more likely to fight and may lead to premature euthanasia
- ☐ Model behavior may be different in the other sex
- ☐ Not relevant to the research question
- ☐ Sample size concerns
- ☐ Welfare issues
- ☐ Other

25. Select which of the following you believe are the advantages, if any, to **including both sexes in an in vivo experimental design**? (choose **all** that apply):

- ☐ 3Rs – Reduction
- ☐ Animal welfare
- ☐ Efficient use of all animals from breeding
- ☐ Reproducibility
- ☐ Translatability
- ☐ Understanding sex differences
- ☐ Other

26. Do you have any other thoughts or comments you would like to provide regarding **including both sexes in an in vivo experimental design**?

27. What is your age?

Number must be between 18 ~ 110

28. If you'd like to be entered into the draw for a £50 Amazon gift card,  
please leave your email address below

---

This content is neither created nor endorsed by Microsoft. The data you submit will be sent to the form owner.
