# Supplementary material for: Addressing cultural and knowledge barriers to enable preclinical sex inclusive research
Source: eLife. 2025 Dec 10;14:RP106545. doi: 10.7554/eLife.106545 (PMC12695025; doi:10.7554/eLife.106545)
Supplement: Supplementary file 1. — The demographic information included is for the full 105 participants who met the inclusion criteria. While all 105 met the inclusion criteria, seven participants left the question about age blank. As age was included as a predictor in the analysis of intent, the missing values were managed with listwise deletion, assuming missing at random, reducing the dataset size to 98 participants (N=35 baseline, N=48 interested, and N=15 intervention). To test for a statistically significant difference (association) between the treatment groups, a Pearson’s Chi-square test was used for categorical variables, ordered logistic regression for nominal variables, and ANOVA test for continuous variables. Institute type was collected as a demographic, the resulted population sampled was predominately academic and this variable was therefore removed from downstream analysis due to the lack of predictive ability to assess institute type on the outcome of interest. The abbreviation name in bracket, within the demographic column, indicates the term used within the statistical model and associated output. [file elife-106545-supp1.xlsx]

## Sheet: Sheet1
Demographic variable	Units or level	Full dataset Mean (range) or Count (% total)	Baseline (N=39)	Interested (N=51)	Intervention (N=15)	Test of association (Test statistic & p value)
Age	Years	39 (21-77)	41.1	36.4	42.7	F2,95 = 1.9; p = 0.15
Gender	Man	41 (39)	15	19	7	Χ2 = 3.3; p = 0.51
	Woman	62 (59)	24	30	8
	Other	2 (2)	0	2	0
Geographic Region	Asia	16 (15)	4	9	3	Χ2 = 4.03; p = 0.67
	Australia	13 (12)	5	6	2
(Geography)	Europe	62 (59)	22	32	8
	Other	14 (13)	8	4	2
Years working in animal research (Year_Work)	Years	14.1 (0-53)	16	11.7	17.6	F2,100 = 1.9; p = 0.15
Institution	Academic	101 (96)	38	49	14	Χ2 = 0.46; p = 0.79
	Other	4 (4)	1	2	1
Highest Education	Doctoral	62 (64)	24	28	10	Χ2 = 4.8; p = 0.31
	Masters	26 (26)	7	14	5
(Education)	Other	10 (10)	4	6	0
Type of in vivo research	Basic biological investigation	69 (66)	24	36	9	Χ2 = 3.5; p = 0.75
	Discovery	14 (13)	6	6	2
(Type_Work)	Drug development / Lead optimization	13 (12)	4	7	2
	Other	9 (9)	5	2	2
Statistical background – Number of courses	>2 courses	18 (17)	7	8	3	Likelihood Χ2 ratio = 0.41; p = 0.81
	1-2 courses	57 (54)	22	27	8
(Stats_Training)	No formal courses	30 (29)	10	16	4
Familiarity with Factorials	Extremely	5 (5)	2	2	1	Likelihood Χ2 ratio = 3.73; p = 0.15
	Familiar	25 (24)	8	13	4
(Factorial_Fam)	Somewhat familiar	33 (31)	16	9	8
	Not very familiar	35 (33)	10	23	2
	Not at all familiar	7 (7)	3	4	0
How often previously incorporated sex?	Almost always:	17 (16)	6	7	4	F2,102 = 2.05; p = 0.13
	76-100%
(Factorial_Incor)	Often:	23 (22)	8	11	4
	51-75%
	Sometimes:	22 (20)	9	8	5
	26-50%
	Rarely:	27 (26)	10	16	1
	1-25%
	Never:	16 (15)	6	9	1
	0
How often can you influence design?	Always	45 (43)	19	19	7	Likelihood Χ2 ratio = 0.65; p = 0.72
	Often	34 (32)	9	19	6
(Ability_Influence)	Sometimes	21 (20)	8	12	1
	Rarely	5 (5)	3	1	1
	Never	0 (0)	0	0	0
