# Supplementary material for: Addressing cultural and knowledge barriers to enable preclinical sex inclusive research
Source: eLife. 2025 Dec 10;14:RP106545. doi: 10.7554/eLife.106545 (PMC12695025; doi:10.7554/eLife.106545)
Supplement: Supplementary file 2. — The demographic information is for the full 31 participants who met the inclusion criteria in study 2. While 31 unique individuals met the criteria, an individual may not have responded to both surveys (N=29 pre-survey and N=28 in the post-survey). For instance, two participants did not meet the inclusion criteria for the pre-survey but met the criteria for the post-intervention survey. For the intention analysis, some missing data was observed in the demographic data. To reduce survey burden, the post-survey only included one demographic question (the participant’s age) to support alignment of data, just in case duplicate initials were used as an identifier. Two responders did not include the age information in the study and were managed with listwise deletion, assuming missing at random. The abbreviation name in bracket, within the demographic column, indicates the term used within the statistical model and associated output. For McNemar’s paired analysis, we conducted listwise deletion, assuming missing at random, reducing the dataset size to 26. [file elife-106545-supp2.xlsx]

## Sheet: Sheet1
Demographic variable	Units or level	Participants
		Mean (range) or Count (% of total); N=31
Age	Years	Avg. 35.4 (range 25-60)
Gender	Man	11 (35)
	Woman	16 (52)
	Other	2 (6)
	Unknown	2 (6)
Type of in vivo research	Basic biological investigation	16 (52)
	Other	13 (13)
(Type_Work)	Unknown	2 (6)
Years working in animal research	Years	Avg. 10.6 (range 0-35)
(Year_Work)
Highest Education	Doctoral	21 (68)
(Education)	Other	8 (26)
	Unknown	2 (6)
How often can you influence design?	Always	15 (48)
	Often	7 (23)
(Ability_Influence)	Sometimes	3 (10)
	Rarely	4 (4)
	Never	0 (0)
	Unknown	2 (6)
Statistical background – Number of courses	>2 courses	4 (13)
	1-2 courses	17 (55)
(Stats_Training)	No formal courses	8 (26)
	Unknown	2 (6)
Familiarity with Factorials	Not at all familiar	5 (16)
	Not very familiar	12 (39)
(Factorial_Fam)	Somewhat familiar	5 (16)
	Familiar	5 (16)
	Extremely familiar	2 (6)
	Unknown	2 (6)
How often previously incorporated sex?	Almost always: 76-100%	9 (29)
	Often: 51-75%	7 (23)
	Sometimes: 26-50%	2 (6)
(Factorial_Incor)	Rarely: 1-25%	9 (29)
	Never: 0%	2 (6)
