# Supplementary material for: Addressing cultural and knowledge barriers to enable preclinical sex inclusive research
Source: eLife. 2025 Dec 10;14:RP106545. doi: 10.7554/eLife.106545 (PMC12695025; doi:10.7554/eLife.106545)
Supplement: Supplementary file 3. — For each participant of study 1, the cumulative knowledge score is reported along with metadata of treatment group and reported gender. Participant identity is masked. [file elife-106545-supp3.xlsx]

## Sheet: Sheet1
Participant ID	Treatment group	Gender	Cumulative Knowledge Score
93	Symposium	Woman	1
96	Symposium	Woman	1
97	Symposium	Man	0
102	Symposium	Man	3
105	Symposium	Man	1
109	Symposium	Woman	2
111	Symposium	Woman	0
113	Symposium	Woman	1
114	Symposium	Woman	0
116	Symposium	Woman	1
117	Symposium	Woman	0
122	Symposium	Woman	1
123	Symposium	Woman	3
124	Symposium	Woman	3
125	Symposium	Woman	2
126	Symposium	Woman	2
127	Symposium	Man	1
129	Symposium	Man	2
130	Symposium	Man	1
132	Symposium	Woman	1
133	Symposium	Man	3
134	Symposium	Woman	1
136	Symposium	Woman	1
138	Symposium	Man	1
140	Symposium	Woman	0
147	Symposium	Man	2
68	Symposium	Man	3
159	Symposium	Woman	3
162	Symposium	Woman	0
201	Symposium	Man	1
72	Conference	Woman	1
73	Conference	Man	1
94	Conference	Woman	1
99	Conference	Woman	2
107	Conference	Man	1
110	Conference	Woman	0
112	Conference	Woman	2
115	Conference	Man	3
118	Conference	Woman	1
120	Conference	Woman	3
121	Conference	Man	2
128	Conference	Woman	1
131	Conference	Man	1
135	Conference	Man	1
139	Conference	Man	1
141	Conference	Man	0
142	Conference	Woman	0
144	Conference	Man	1
10	Conference	Man	1
11	Conference	Woman	2
12	Conference	Man	4
13	Conference	Man	1
14	Conference	Woman	2
15	Conference	Man	2
16	Conference	Woman	1
20	Conference	Man	1
21	Conference	Man	1
22	Conference	Woman	2
23	Conference	Woman	1
24	Conference	Woman	0
27	Conference	Man	3
28	Conference	Man	2
29	Conference	Woman	2
35	Conference	Man	2
36	Conference	Man	2
38	Conference	Woman	1
39	Conference	Woman	2
40	Conference	Woman	1
41	Conference	Woman	1
42	Conference	Woman	0
44	Conference	Man	1
45	Conference	Man	1
46	Conference	Woman	2
47	Conference	Woman	1
49	Conference	Woman	2
50	Conference	Woman	1
52	Conference	Woman	1
53	Conference	Woman	1
54	Conference	Woman	2
55	Conference	Woman	3
56	Conference	Woman	4
58	Conference	Woman	2
62	Conference	Woman	1
63	Conference	Man	3
64	Conference	Man	3
65	Conference	Man	2
67	Conference	Woman	1
69	Conference	Woman	0
153	Conference	Other	2
170	Conference	Woman	2
175	Workshop	Woman	3
176	Workshop	Woman	3
177	Workshop	Man	5
178	Workshop	Man	4
179	Workshop	Woman	1
192	Workshop	Woman	5
193	Workshop	Woman	4
194	Workshop	Woman	3
195	Workshop	Man	2
196	Workshop	Woman	2
197	Workshop	Woman	3
198	Workshop	Man	3
199	Workshop	Man	0
200	Workshop	Man	3
