# Supplementary material for: Addressing cultural and knowledge barriers to enable preclinical sex inclusive research
Source: eLife. 2025 Dec 10;14:RP106545. doi: 10.7554/eLife.106545 (PMC12695025; doi:10.7554/eLife.106545)
Supplement: Supplementary file 4. — For each participant in study 2, the pre- and post-cumulative knowledge score is reported. Participant identity is masked. [file elife-106545-supp4.xlsx]

## Sheet: Sheet1
Participant Initials	Pre-workshop: Cumulative score	Post-workshop: Cumulative score
AAA	4	5
ABC	1	1
AC	3	5
AJH	3	0
AJM	2	2
CKTL	1	3
CMG	2	3
DDD	3	5
DRH	2	4
EAS	2	5
EMJ	0	4
GJF	4	4
JJD	1	2
JWH	1	5
ksk	1	3
MC	1	3
MIP	0	4
MSU	0	5
NNK	1	5
OMO	1	5
PEE	0	3
RBN	1	3
RYX	1	0
SFA	3	0
SMC	1	5
SSS	1	2
